# Supplementary material
Source: MDPI journal article supplement (https://www.mdpi.com/2571-8789/2/4/65)
Supplement: s1 [file s1]

### Supplementary Information

**Table S1.** Soil properties (bulk density, water content, Fe concentrations and total C and N) measured for soils from valley and slope position in wet tropical forest in Puerto Rico. An asterisk (\*) designates statistically significant differences between soils ( $p < 0.01$ ).

| Soil   | Bulk Density<br>( $\text{g cm}^{-3}$ ) | Water content<br>(%) | pH             | Fe (II)<br>( $\mu\text{g Fe}^{2+} \text{ g soil}^{-1}$ ) | Fe (III) + Fe (II)<br>( $\mu\text{g Fe g soil}^{-1}$ ) | Total C (%)    | Total N (%)   |
|--------|----------------------------------------|----------------------|----------------|----------------------------------------------------------|--------------------------------------------------------|----------------|---------------|
| Slope  | $0.54 \pm 0.1$                         | $30.1 \pm 4.2$       | $5.2 \pm 0.15$ | $53.3 \pm 9$                                             | $1100 \pm 90$                                          | $3.81 \pm 0.2$ | $0.3 \pm 0.0$ |
| Valley | $0.63 \pm 0.1$                         | $*55.2 \pm 8.3$      | $5.0 \pm 0.11$ | $*340 \pm 10$                                            | $*5700 \pm 270$                                        | $4.17 \pm 0.2$ | $0.4 \pm 0.1$ |

**Figure S1.** Soil Fe (II) concentrations ( $\mu\text{g Fe g soil}^{-1}$ ) measured after to oxic and anoxic pre-incubations for soils from valley (up) and slope (bottom) positions in wet tropical forest in Puerto Rico. An asterisk (\*) designates statistically significant differences between treatments ( $p < 0.01$ ).

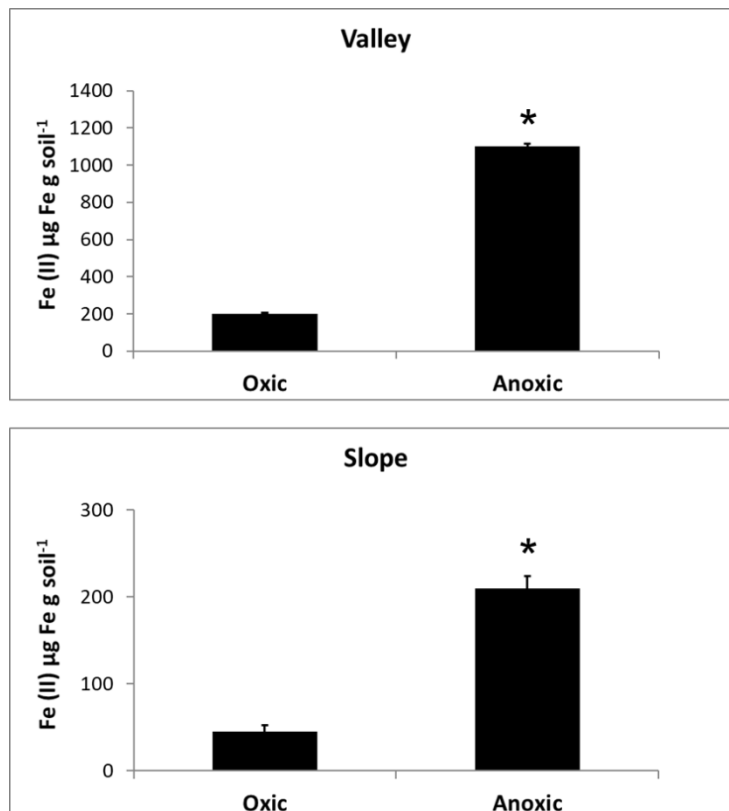

**Table S2.** P concentrations in different soil P fractions ( $\mu\text{g P g soil}^{-1}$ ) and soil  $\text{CO}_2$  production ( $\mu\text{g C g soil}^{-1} \text{ day}^{-1}$ ) measured for soil from valley and slope positions in wet tropical forest in Puerto Rico, pre-incubated under oxidic (O+) or anoxic (O-) headspace and amended with P and C or DI water (control). \* designates statistically significant differences between samples ( $p < 0.01$ ).

| Soil   | Treatment   | Resin P   | Microbial P | Inorganic P | Organic P   | Respired $\text{CO}_2$ |
|--------|-------------|-----------|-------------|-------------|-------------|------------------------|
| Valley | P+C, O+     | 1.8±1.8   | 26.6±0.1    | 49±12.3     | 173.2±25.0  | 8.1±2.0                |
| Valley | P+C, O-     | 4.7±0.5   | 25.2±0.5    | 38.0±4.3    | 197.1±20.7  | *5.0±1.1               |
| Valley | DI only, O+ | 0.1±0.0   | 15.8±1.0    | 25.2±6.0    | 179.9±12.2  | 1.8±0.4                |
| Valley | DI only, O- | 0.3±0.1   | 12.9±0.8    | 17.9±3.4    | 169.6±36.3  | 1.1±0.3                |
| Slope  | P+C, O+     | 37.1±16.0 | 133.4±10.0  | 148.4±20.2  | 59.1±11.2   | 122.5±16.2             |
| Slope  | P+C, O-     | 37.4±10.0 | *102.0±7.0  | *73.9±30.5  | *188.3±24.7 | *80.1±9.7              |
| Slope  | DI Only, O+ | 0.1±0.0   | 82.1±4.0*   | 52.2±9.6*   | 44.6±7.2    | 32.6±3.7               |
| Slope  | DI Only, O- | 0.1±0.0   | *49.2±7.0*  | *31±2.2     | *119.8±37.1 | 24.7±1.5               |

| Fe (II)                       |        |
|-------------------------------|--------|
| Factor                        | P      |
| Soil type                     | <0.001 |
| Headspace                     | <0.001 |
| Substrate                     | NA     |
| Soil type/Headspace           | <0.321 |
| Soil type/Substrate           | NA     |
| Headspace/Substrate           | NA     |
| Soil type/Headspace/Substrate | NA     |

| CO <sub>2</sub>               |        |
|-------------------------------|--------|
| Factor                        | P      |
| Soil type                     | <0.001 |
| Headspace                     | <0.238 |
| Substrate                     | <0.001 |
| Soil type/Headspace           | <0.001 |
| Soil type/Substrate           | <0.001 |
| Headspace/Substrate           | <0.214 |
| Soil type/Headspace/Substrate | <0.135 |

| Pmic                          |        |
|-------------------------------|--------|
| Factor                        | P      |
| Soil type                     | <0.001 |
| Headspace                     | <0.169 |
| Substrate                     | <0.001 |
| Soil type/Headspace           | <0.001 |
| Soil type/Substrate           | <0.001 |
| Headspace/Substrate           | <0.197 |
| Soil type/Headspace/Substrate | <0.187 |

| NaOH Pi                       |        |
|-------------------------------|--------|
| Factor                        | P      |
| Soil type                     | <0.125 |
| Headspace                     | <0.001 |
| Substrate                     | <0.001 |
| Soil type/Headspace           | <0.001 |
| Soil type/Substrate           | <0.118 |
| Headspace/Substrate           | <0.434 |
| Soil type/Headspace/Substrate | <0.356 |

| NaOH Po                       |        |
|-------------------------------|--------|
| Factor                        | P      |
| Soil type                     | <0.001 |
| Headspace                     | <0.001 |
| Substrate                     | <0.242 |
| Soil type/Headspace           | <0.001 |
| Soil type/Substrate           | <0.187 |
| Headspace/Substrate           | <0.115 |
| Soil type/Headspace/Substrate | <0.254 |

**Table S3.** Three-way ANOVA test was performed, in which soil type, headspace treatment and substrate addition were included as independent variables and Fe (II) concentrations, soil CO<sub>2</sub> production, microbial P, NaOH Pi and NaOH Po were included as dependent variables. Substrate addition was not included as an independent variable for Fe (II) variable.
